# Supplementary material for: The Impact of Shared Information Presentation Time on Users’ Privacy-Regulation Behavior in the Context of Vertical Privacy: A Moderated Mediation Model
Source: MDPI journal article supplement (doi:10.3390/bs13090706), 2023-08-25
Supplement: s1 [file s1]

## Supplementary Materials

Table S1. Manipulation of Presentation Time

|        | Measurements                                                                             | Source            |
|--------|------------------------------------------------------------------------------------------|-------------------|
| Item 1 | Rate the response speed of the recommendations provided by the app "Y".                  | Wang et al., 2022 |
| Item 2 | Rate how well the recommendations speed of the app "Y" fits your needs.                  |                   |
| Item 3 | Rate the time required for the app "Y" to generate recommendations that fits your needs. |                   |

Note: 7-point Likert scale:1 - very low, 7 - very high.

Table S2. Variables' Measurements

| Variables                   |       | Measurements                                                                                              | Source                                    |
|-----------------------------|-------|-----------------------------------------------------------------------------------------------------------|-------------------------------------------|
| Perceived control           | PRC 1 | I believe I have control over who can get access to my personal information.                              | Xu et al., 2013<br>De Wolf et al., 2014   |
|                             | PRC 2 | I think I have control over what personal information is released and used by this website.               |                                           |
|                             | PRC 3 | I believe I can control my personal information provided to this website.                                 |                                           |
| Online vigilance            | OV 1  | It is likely that apps got authorized usage information across platforms.                                 | Liang et al., 2014<br>Sharma et al., 2014 |
|                             | OV 2  | It is likely that my browsing history on the app is monitored by other platforms.                         |                                           |
|                             | OV 3  | The content I was browsing through the app is being recommended quickly to me by other platforms.         |                                           |
|                             | OV 4  | The app will quickly update information at least part of the time.                                        |                                           |
| Privacy regulation behavior | PRB 1 | I will adjust privacy settings to limit the personal recommendations in the app "Y" .                     | De Wolf et al., 2014                      |
|                             | PRB 2 | I will be careful with accepting authorized requests from third party services offering from across apps. |                                           |
|                             | PRB 3 | I will use different accounts to log in for different purposes.                                           |                                           |
|                             | PRB 4 | I will make some customized visible group of friends in the app"Y"                                        |                                           |
|                             | CRB 1 | I will delete my browsing history in the app "Y" .                                                        |                                           |
|                             | CRB 2 | I will cancel the authorization of the third party services which I used in app "Y".                      |                                           |
|                             | CRB 3 | I will delete my account and quit the app "Y" .                                                           |                                           |

|                      |      |                                                                                                             |                          |
|----------------------|------|-------------------------------------------------------------------------------------------------------------|--------------------------|
| Privacy Concerns     | PC 1 | It usually bothers me when companies ask me for personal information.                                       | Malhotra et al.,<br>2004 |
|                      | PC 2 | When companies ask me for personal information, I sometimes think twice before providing it.                |                          |
|                      | PC 3 | It bothers me to give personal information to so many companies.                                            |                          |
|                      | PC 4 | I am concerned that online companies are collecting too much personal information about me.                 |                          |
| Information Overload | IO 1 | I could effectively handle every piece of information about the brand B e-book on this app.                 | Chung et al.,<br>2023    |
|                      | IO 2 | There was too much information about the brand B e-book on this app that I was burdened by dealing with it. |                          |
|                      | IO 3 | I feel overwhelmed with the number of recommendations I receive on this app about the brand B e-book.       |                          |

Note: 7-point Likert scale:1 - very disagree, 7 - very agree.
